# Supplementary material for: How European primary care practitioners think the timeliness of cancer diagnosis can be improved: a thematic analysis
Source: PubMed Central journal article supplement — BMJ Open. 2019 Sep 24;9(9):e030169. doi: 10.1136/bmjopen-2019-030169 (PMC6773305; doi:10.1136/bmjopen-2019-030169), 2019-09-24
Supplement: bmjopen-2019-030169supp001.pdf [file bmjopen-2019-030169supp001.pdf]

### Supplementary file. Ethical and other approvals obtained in each Örenäs Research Group participating jurisdiction

|             | Date of Ethics Approval | Approvals obtained                                                                                                                                                                                                                                     | Reference                                              |
|-------------|-------------------------|--------------------------------------------------------------------------------------------------------------------------------------------------------------------------------------------------------------------------------------------------------|--------------------------------------------------------|
| Bulgaria    | 29 October 2015         | Medical University Plovdiv Ethical Commission                                                                                                                                                                                                          | P-7820                                                 |
| Croatia     | 16 December 2016        | Nastavni Zovod Za Javno Zdravstvo                                                                                                                                                                                                                      | 08-820-61/31-15                                        |
| Denmark     | 7 May 2016              | Danish Data Protection Agency; according to Danish law and the Central Denmark Region Committees on Health Research Ethics, approval by the National Committee on Health Research Ethics was not required as no biomedical intervention was performed. | 2009-41-3471                                           |
| Finland     | 16 November 2016        | Academic Ethics Committee of the Tampere Region                                                                                                                                                                                                        | 16 November 2016                                       |
| France      | N/A                     | In France, research ethics approval was not required as no biomedical intervention was performed.                                                                                                                                                      |                                                        |
| Germany     | 15 January 2016         | Ethik-Kommission Universität Duisberg-Essen                                                                                                                                                                                                            | 16-6747-BO                                             |
| Greece      | N/A                     | In Greece, research ethics approval was not required as no biomedical intervention was performed.                                                                                                                                                      |                                                        |
| Israel      | N/A                     | In Israel, research ethics approval was not required as no biomedical intervention was performed.                                                                                                                                                      |                                                        |
| Italy       | N/A                     | In Italy the approval of the ethical committee is not required when a study is neither an interventional nor an observational study on pharmacological treatment.                                                                                      | Decreto Legislativo n. 211 (24 giugno 2003)<2001/20/EC |
| Netherlands | 27 June 2016            | medisch-ethischetoetsingscommissie (METC) azM/UM Maastricht UMC+                                                                                                                                                                                       | METC 16-4-113                                          |
| Norway      | N/A                     | In Norway, research ethics approval was not required as no biomedical intervention was performed.                                                                                                                                                      |                                                        |
| Poland      | 28 January 2016         | Komisja Bioetyczna Uniwersytetu Medycznego w Białymstoku                                                                                                                                                                                               | R_I_022/10/2016                                        |

|                |                                     |                                                                                                                                                                                                                                |                          |
|----------------|-------------------------------------|--------------------------------------------------------------------------------------------------------------------------------------------------------------------------------------------------------------------------------|--------------------------|
| Portugal       | N/A                                 | In Portugal, research ethics approval was not required as no biomedical intervention was performed.                                                                                                                            |                          |
| Romania        | N/A                                 | In Romania, research ethics approval was not required as no biomedical intervention was performed.                                                                                                                             |                          |
| Slovenia       | 8 December 2014                     | Komisija Republike Slovenije Medicinsko Etiko                                                                                                                                                                                  | KME 113/08/14            |
| Spain          | 25 October 2015<br>23 December 2015 | Comissio d'Investigacio Govern de les Illes Balears<br>Informe del Comite Etic d'Investigacio Clinica                                                                                                                          | Palma 27oct15<br>P15/159 |
| Sweden         | N/A                                 | In Sweden, research ethics approval was not required as no biomedical intervention was performed. It does not fall under the law of research on human subjects to ask professionals about their work and how they perceive it. |                          |
| Switzerland    | N/A                                 | Swiss law on human research (Humanforschungsgesetz, HFG) does not require that an ethics committee approve collection and analysis of non-medical and anonymous data.                                                          |                          |
| United Kingdom | 24 November 2014                    | Research Ethics Approval Committee for Health, University of Bath                                                                                                                                                              | EP 14/15 66              |
